# Supplementary material
Source: PubMed Central journal article supplement (PMC5881679)

# Supplemental Figure 1

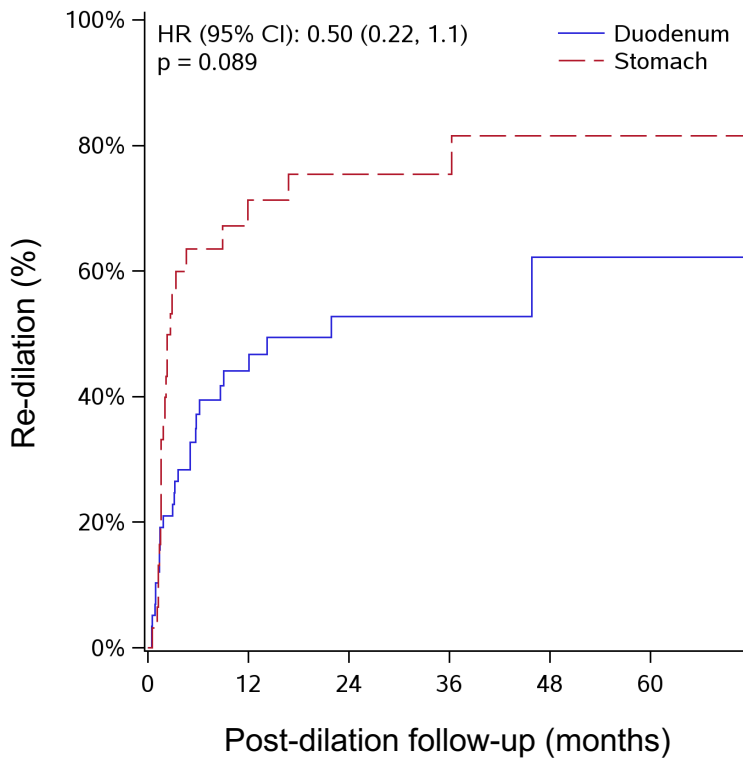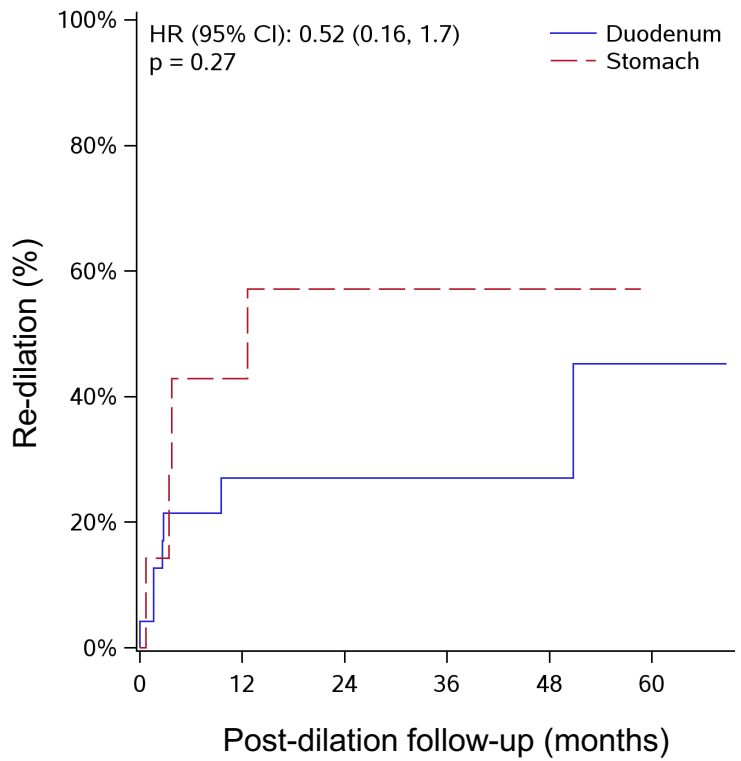

Supplement: jjx078_suppl_supplementary_figure.pdf [file jjx078_suppl_supplementary_figure.pdf]
